# Supplementary material for: Identification of Metastasis-Associated MicroRNAs in Metastatic Melanoma by miRNA Expression Profile and Experimental Validation
Source: Front Genet. 2021 Apr 9;12:663110. doi: 10.3389/fgene.2021.663110 (PMC8063111; doi:10.3389/fgene.2021.663110)
Supplement: Supplementary file 3 [file Data_Sheet_3.xls]

## Sheet: hsa-miR-155-5p
Category	Term	Count	%	PValue	Genes	List Total	Pop Hits	Pop Total	Fold Enrichment	Bonferroni	Benjamini	FDR
KEGG_PATHWAY	hsa05210:Colorectal cancer	20	2.22222	1.66058e-09	MSH6, MSH2, SMAD4, SMAD3, MLH1, SMAD2, CTNNB1, AKT1, FOS, CASP3, CCND1, KRAS, JUN, GSK3B, RAC1, RHOA, PIK3CA, MYC, PIK3R1, APC	415	62	6879	5.34707	4.40055e-07	4.40055e-07	2.17702e-06
KEGG_PATHWAY	hsa05161:Hepatitis B	29	3.22222	2.59393e-08	MAVS, E2F2, YWHAZ, CXCL8, NFKB1, PTEN, AKT1, FOS, CASP3, MYD88, KRAS, TICAM2, CREB3L2, PIK3CA, MYC, PIK3R1, IL6, SMAD4, FADD, CDK4, STAT1, CDK2, STAT3, IKBKE, CCND1, CDKN1B, JUN, DDB2, APAF1	415	145	6879	3.31518	6.8739e-06	3.43695e-06	3.40064e-05
KEGG_PATHWAY	hsa05200:Pathways in cancer	53	5.88889	3.57883e-08	GNA13, E2F2, FGF7, MITF, SPI1, MLH1, NFKB1, PTEN, CTNNB1, AKT1, AGTR1, FOS, CASP3, CDKN2A, RHOA, PIK3CA, HHIP, MYC, FGF2, EGFR, FADD, CDK4, CTNNA1, CDK2, RAD51, JUP, CCND1, HIF1A, JUN, GNAS, GNB4, WNT5A, CXCL8, KRAS, RAC1, NKX3-1, PIK3R1, CSF1R, APC, MSH6, IL6, COL4A2, VHL, MSH2, CBL, SMAD4, SMAD3, SMAD2, STAT1, STAT3, CDKN1B, ETS1, GSK3B	415	393	6879	2.23543	9.48385e-06	3.16129e-06	4.69184e-05
KEGG_PATHWAY	hsa05212:Pancreatic cancer	17	1.88889	9.36289e-07	EGFR, E2F2, SMAD4, SMAD3, NFKB1, SMAD2, CDK4, STAT1, STAT3, RAD51, AKT1, CCND1, KRAS, CDKN2A, RAC1, PIK3CA, PIK3R1	415	65	6879	4.33524	0.000248086	6.20272e-05	0.00122747
KEGG_PATHWAY	hsa04668:TNF signaling pathway	22	2.44444	1.13053e-06	ICAM1, IL6, CCL2, CEBPB, SOCS3, EDN1, NFKB1, FADD, TAB2, JUNB, AKT1, VCAM1, FOS, CASP3, MAPK13, JUN, MAPK14, CREB3L2, PIK3CA, MAP3K14, SELE, PIK3R1	415	107	6879	3.40813	0.000299546	5.99165e-05	0.00148212
KEGG_PATHWAY	hsa04068:FoxO signaling pathway	24	2.66667	4.00045e-06	EGFR, IL6, GABARAPL1, SMAD4, SMAD3, SMAD2, FOXO3, SIRT1, PTEN, CDK2, STAT3, AKT1, CCND1, S1PR1, KRAS, CDKN1B, MAPK13, CCND2, PLK1, MAPK14, PIK3CA, BCL6, CAT, PIK3R1	415	134	6879	2.96882	0.00105956	0.000176671	0.00524446
KEGG_PATHWAY	hsa05166:HTLV-I infection	35	3.88889	7.55606e-06	WNT5A, XPO1, E2F2, SPI1, NFKB1, CTNNB1, VCAM1, AKT1, FOS, POLE4, CDKN2A, KRAS, POLE3, ELK4, PIK3CA, MYB, MYC, PIK3R1, APC, ZFP36, ICAM1, IL6, SMAD4, SMAD3, SMAD2, CDK4, CCND1, CCND2, ETS1, JUN, GSK3B, HLA-DPA1, MAP3K14, TP53INP1, IL2	415	254	6879	2.28408	0.00200036	0.000286011	0.00990553
KEGG_PATHWAY	hsa05213:Endometrial cancer	14	1.55556	8.26572e-06	EGFR, AKT1, CCND1, KRAS, GSK3B, PIK3CA, MLH1, FOXO3, CTNNA1, PTEN, MYC, PIK3R1, APC, CTNNB1	415	52	6879	4.46274	0.00218803	0.000273766	0.0108358
KEGG_PATHWAY	hsa04917:Prolactin signaling pathway	16	1.77778	1.55006e-05	SOCS3, SOCS1, NFKB1, FOXO3, STAT1, STAT3, AKT1, FOS, CCND1, KRAS, MAPK13, CCND2, GSK3B, MAPK14, PIK3CA, PIK3R1	415	71	6879	3.73541	0.00409925	0.000456305	0.0203193
KEGG_PATHWAY	hsa04660:T cell receptor signaling pathway	19	2.11111	2.32182e-05	ITK, CTLA4, NFKB1, CDK4, VAV2, AKT1, FOS, CARD11, KRAS, PAK2, MAPK13, JUN, GSK3B, MAPK14, RHOA, PIK3CA, MAP3K14, PIK3R1, IL2	415	100	6879	3.14942	0.00613401	0.000615101	0.0304348
KEGG_PATHWAY	hsa04550:Signaling pathways regulating pluripotency of stem cells	23	2.55556	2.76413e-05	WNT5A, JARID2, SMAD5, SMAD4, SMAD3, NEUROG1, SMAD2, SMAD1, MEIS1, ZIC3, STAT3, CTNNB1, AKT1, KRAS, RIF1, MAPK13, MAPK14, GSK3B, PIK3CA, FGF2, MYC, PIK3R1, APC	415	140	6879	2.72318	0.00729829	0.000665692	0.0362317
KEGG_PATHWAY	hsa05142:Chagas disease (American trypanosomiasis)	19	2.11111	4.02026e-05	IL6, CCL2, CXCL8, SMAD3, NFKB1, SMAD2, FADD, AKT1, FOS, MYD88, MAPK13, JUN, MAPK14, PIK3CA, GNAS, IFNGR1, PIK3R1, PPP2R2A, IL2	415	104	6879	3.02829	0.0105973	0.00088743	0.0526927
KEGG_PATHWAY	hsa05132:Salmonella infection	16	1.77778	0.000105878	IL6, PKN2, CXCL8, NFKB1, FLNB, FLNA, FOS, TJP1, MYD88, ARPC3, MAPK13, JUN, MAPK14, RAC1, DYNC2H1, IFNGR1	415	83	6879	3.19535	0.0276692	0.00215607	0.138717
KEGG_PATHWAY	hsa05160:Hepatitis C	21	2.33333	0.00012013	EGFR, MAVS, SOCS3, CXCL8, NFKB1, STAT1, STAT3, AKT1, IKBKE, KRAS, MAPK13, GSK3B, EIF3E, MAPK14, CD81, CLDN1, PIK3CA, PSME3, PIK3R1, NR1H3, PPP2R2A	415	133	6879	2.61725	0.031335	0.00227145	0.157376
KEGG_PATHWAY	hsa04066:HIF-1 signaling pathway	17	1.88889	0.000170123	EGFR, PDK1, IL6, FLT1, VHL, EDN1, HK2, NFKB1, STAT3, AKT1, HIF1A, CDKN1B, PIK3CA, NOS3, EIF4E2, IFNGR1, PIK3R1	415	96	6879	2.93532	0.0440851	0.00300125	0.222801
KEGG_PATHWAY	hsa05162:Measles	20	2.22222	0.000348812	MAVS, IL6, NFKB1, CDK4, STAT1, TAB2, CDK2, STAT3, TNFRSF10A, AKT1, IKBKE, CCND1, MYD88, CDKN1B, CCND2, GSK3B, PIK3CA, IFNGR1, PIK3R1, IL2	415	133	6879	2.49262	0.0883064	0.00576155	0.456328
KEGG_PATHWAY	hsa04620:Toll-like receptor signaling pathway	17	1.88889	0.000543856	IL6, CXCL8, NFKB1, FADD, STAT1, TAB2, AKT1, IKBKE, FOS, MYD88, MAPK13, MAPK14, JUN, RAC1, TICAM2, PIK3CA, PIK3R1	415	106	6879	2.6584	0.134252	0.0084442	0.710651
KEGG_PATHWAY	hsa05120:Epithelial cell signaling in Helicobacter pylori infection	13	1.44444	0.000560341	EGFR, ADAM10, CXCL8, ATP6V1H, NFKB1, ATP6V1C1, CASP3, TJP1, MAPK13, JUN, MAPK14, RAC1, MAP3K14	415	67	6879	3.21622	0.138028	0.00821783	0.73212
KEGG_PATHWAY	hsa05215:Prostate cancer	15	1.66667	0.000699372	EGFR, AKT1, E2F2, CCND1, CDKN1B, KRAS, GSK3B, CREB3L2, NKX3-1, PIK3CA, NFKB1, PTEN, PIK3R1, CDK2, CTNNB1	415	88	6879	2.82544	0.169227	0.00971036	0.913003
KEGG_PATHWAY	hsa04662:B cell receptor signaling pathway	13	1.44444	0.0007384	AKT1, CARD11, FOS, KRAS, JUN, GSK3B, CD81, RAC1, PIK3CA, NFKB1, INPP5D, VAV2, PIK3R1	415	69	6879	3.123	0.177781	0.00973968	0.963725
KEGG_PATHWAY	hsa04151:PI3K-Akt signaling pathway	37	4.11111	0.000769005	YWHAZ, FGF7, ITGB4, ITGB5, NFKB1, FOXO3, PTEN, CDC37, AKT1, KRAS, RAC1, CREB3L2, PIK3CA, NOS3, MYB, THBS1, MYC, FGF2, PIK3R1, CSF1R, EGFR, IL6, COL4A2, FLT1, PKN2, CDK4, RPTOR, CDK2, CCND1, CDKN1B, CCND2, GSK3B, RHEB, GNB4, EIF4E2, IL2, PPP2R2A	415	345	6879	1.77771	0.184427	0.00966088	1.00348
KEGG_PATHWAY	hsa04380:Osteoclast differentiation	19	2.11111	0.000796849	SOCS3, SOCS1, MITF, SPI1, NFKB1, STAT1, TAB2, JUNB, AKT1, FOS, MAPK13, JUN, MAPK14, RAC1, PIK3CA, MAP3K14, IFNGR1, PIK3R1, CSF1R	415	131	6879	2.40414	0.190428	0.00955628	1.03964
KEGG_PATHWAY	hsa05218:Melanoma	13	1.44444	0.000961505	EGFR, E2F2, FGF7, MITF, CDK4, PTEN, AKT1, CCND1, KRAS, CDKN2A, PIK3CA, FGF2, PIK3R1	415	71	6879	3.03502	0.225022	0.0110223	1.25322
KEGG_PATHWAY	hsa04152:AMPK signaling pathway	18	2	0.00103444	RAB2A, CAB39L, SCD, EEF2, FOXO3, SIRT1, RPTOR, CPT1A, AKT1, CCND1, CD36, CREB3L2, RAB14, RHEB, PIK3CA, CAB39, PIK3R1, PPP2R2A	415	123	6879	2.42574	0.239873	0.0113629	1.34769
KEGG_PATHWAY	hsa05220:Chronic myeloid leukemia	13	1.44444	0.00109254	AKT1, E2F2, CCND1, CDKN2A, CDKN1B, KRAS, CBL, SMAD4, PIK3CA, NFKB1, CDK4, MYC, PIK3R1	415	72	6879	2.99287	0.251499	0.0115204	1.42289
KEGG_PATHWAY	hsa03013:RNA transport	22	2.44444	0.00144666	XPO1, UPF2, EEF1A2, NUPL2, NUP155, EIF3C, EIF3CL, EIF4G2, EIF3A, EIF3G, NUP62, EIF3E, EIF4A1, EIF3F, CYFIP1, THOC7, EIF3J, EIF2B2, EIF4E2, EIF2B5, GEMIN5, NMD3	415	172	6879	2.12017	0.318624	0.0146471	1.88004
KEGG_PATHWAY	hsa05164:Influenza A	22	2.44444	0.00167471	MAVS, ICAM1, XPO1, IL6, CCL2, SOCS3, CXCL8, NFKB1, STAT1, TNFRSF10A, AKT1, IKBKE, MYD88, MAPK13, JUN, GSK3B, MAPK14, PIK3CA, HLA-DPA1, DNAJB1, IFNGR1, PIK3R1	415	174	6879	2.0958	0.358643	0.0163162	2.17341
KEGG_PATHWAY	hsa04931:Insulin resistance	16	1.77778	0.00191353	IL6, SOCS3, NFKB1, PTEN, CPT1A, STAT3, AKT1, CD36, PYGL, GSK3B, CREB3L2, PIK3CA, NOS3, SLC27A2, PIK3R1, NR1H3	415	108	6879	2.45569	0.398045	0.0179643	2.47978
KEGG_PATHWAY	hsa05205:Proteoglycans in cancer	24	2.66667	0.00196269	WNT5A, EGFR, CBL, ITGB5, PDCD4, FLNB, STAT3, FLNA, PLAUR, CTNNB1, AKT1, CASP3, CCND1, HIF1A, KRAS, MAPK13, MAPK14, RAC1, RHOA, PIK3CA, THBS1, FGF2, MYC, PIK3R1	415	200	6879	1.98911	0.40585	0.0177924	2.54273
KEGG_PATHWAY	hsa04150:mTOR signaling pathway	11	1.22222	0.00215404	AKT1, CAB39L, PIK3CA, RRAGA, RHEB, CAB39, RICTOR, PTEN, PIK3R1, EIF4E2, RPTOR	415	58	6879	3.14371	0.435287	0.0188677	2.78741
KEGG_PATHWAY	hsa05144:Malaria	10	1.11111	0.00226337	VCAM1, ICAM1, IL6, CD36, CCL2, MYD88, CD81, CXCL8, THBS1, SELE	415	49	6879	3.38284	0.451447	0.0191837	2.92695
KEGG_PATHWAY	hsa05169:Epstein-Barr virus infection	17	1.88889	0.00250618	ICAM1, NFKB1, TAB2, CDK2, STAT3, AKT1, CDKN1B, MAPK13, JUN, MAPK14, PIK3CA, HLA-DPA1, RBPJ, ENTPD1, MAP3K14, MYC, PIK3R1	415	122	6879	2.30976	0.485712	0.020566	3.23621
KEGG_PATHWAY	hsa05219:Bladder cancer	9	1	0.00264897	EGFR, E2F2, CCND1, CDKN2A, KRAS, CXCL8, THBS1, CDK4, MYC	415	41	6879	3.63861	0.504857	0.021075	3.41764
KEGG_PATHWAY	hsa04510:Focal adhesion	24	2.66667	0.00288203	EGFR, COL4A2, FLT1, ITGB4, ITGB5, VAV2, PTEN, FLNB, FLNA, CTNNB1, AKT1, CCND1, DOCK1, PAK2, CCND2, JUN, GSK3B, RAC1, RHOA, PIK3CA, RAP1B, THBS1, MYLK, PIK3R1	415	206	6879	1.93117	0.534592	0.0222442	3.71311
KEGG_PATHWAY	hsa04120:Ubiquitin mediated proteolysis	18	2	0.00336915	SOCS3, VHL, UBE2G1, SOCS1, CBL, UBE2J1, HERC4, UBE2J2, UBE2H, FBXW7, UBE2D3, UBE2D2, UBA2, UBA3, TRIM32, DDB2, DET1, CUL4B	415	137	6879	2.17786	0.591119	0.0252286	4.32796
KEGG_PATHWAY	hsa05321:Inflammatory bowel disease (IBD)	11	1.22222	0.00453186	IL6, JUN, SMAD3, NFKB1, SMAD2, HLA-DPA1, RORA, STAT1, STAT3, IFNGR1, IL2	415	64	6879	2.84898	0.69991	0.0328826	5.78094
KEGG_PATHWAY	hsa05230:Central carbon metabolism in cancer	11	1.22222	0.00453186	AKT1, EGFR, PDK1, SLC1A5, KRAS, HIF1A, HK2, PIK3CA, PTEN, MYC, PIK3R1	415	64	6879	2.84898	0.69991	0.0328826	5.78094
KEGG_PATHWAY	hsa05222:Small cell lung cancer	13	1.44444	0.00461368	E2F2, COL4A2, NFKB1, CDK4, PTEN, CDK2, AKT1, CCND1, CDKN1B, PIK3CA, APAF1, MYC, PIK3R1	415	85	6879	2.53514	0.706376	0.0325779	5.88241
KEGG_PATHWAY	hsa05133:Pertussis	12	1.33333	0.00489492	FOS, CASP3, IL6, MYD88, MAPK13, CFL2, MAPK14, JUN, TICAM2, RHOA, CXCL8, NFKB1	415	75	6879	2.65214	0.727561	0.0336406	6.23044
KEGG_PATHWAY	hsa05202:Transcriptional misregulation in cancer	20	2.22222	0.005292	CCNT2, IL6, CEBPB, FLT1, SPI1, CXCL8, NFKB1, SMAD1, MEIS1, JUP, CDKN1B, FLI1, SIN3A, SP1, ELK4, CCND2, BCL6, MYC, RUNX2, CSF1R	415	167	6879	1.98514	0.754904	0.0354118	6.7198
KEGG_PATHWAY	hsa04071:Sphingolipid signaling pathway	16	1.77778	0.00534423	GNA13, SGPL1, NFKB1, PTEN, AKT1, KRAS, S1PR1, MAPK13, MAPK14, RAC1, RHOA, PIK3CA, NOS3, PIK3R1, PPP2R2A, DEGS1	415	120	6879	2.21012	0.758291	0.0348777	6.78399
KEGG_PATHWAY	hsa05211:Renal cell carcinoma	11	1.22222	0.00567148	AKT1, KRAS, HIF1A, PAK2, VHL, ETS1, JUN, RAC1, PIK3CA, RAP1B, PIK3R1	415	66	6879	2.76265	0.778475	0.036094	7.18526
KEGG_PATHWAY	hsa05223:Non-small cell lung cancer	10	1.11111	0.00575228	AKT1, EGFR, E2F2, CCND1, CDKN2A, KRAS, PIK3CA, FOXO3, CDK4, PIK3R1	415	56	6879	2.95998	0.783194	0.0357444	7.28408
KEGG_PATHWAY	hsa05221:Acute myeloid leukemia	10	1.11111	0.00575228	JUP, AKT1, CCND1, KRAS, SPI1, PIK3CA, NFKB1, MYC, PIK3R1, STAT3	415	56	6879	2.95998	0.783194	0.0357444	7.28408
KEGG_PATHWAY	hsa04115:p53 signaling pathway	11	1.22222	0.00631941	CASP3, CCND1, CDKN2A, CCND2, RRM2, DDB2, APAF1, THBS1, CDK4, PTEN, CDK2	415	67	6879	2.72142	0.813618	0.0383154	7.97503
KEGG_PATHWAY	hsa05100:Bacterial invasion of epithelial cells	12	1.33333	0.00661381	CLTA, DOCK1, ARPC3, RAC1, CBL, RHOA, PIK3CA, CLTC, CTNNA1, PIK3R1, SEPT11, CTNNB1	415	78	6879	2.55014	0.827694	0.0391774	8.33183
KEGG_PATHWAY	hsa04110:Cell cycle	16	1.77778	0.00723731	E2F2, CCND1, YWHAZ, CDKN2A, CDKN1B, CCND2, PLK1, GSK3B, SMAD4, SMAD3, SMAD2, CDK4, MYC, CDK2, WEE1, STAG2	415	124	6879	2.13883	0.854104	0.0418727	9.08326
KEGG_PATHWAY	hsa04810:Regulation of actin cytoskeleton	23	2.55556	0.00751946	GNA13, EGFR, FGF7, DIAPH3, SSH2, ITGB4, ABI2, ITGB5, VAV2, NCKAP1, DOCK1, KRAS, PAK2, ARPC3, CFL2, RAC1, RHOA, PIK3CA, CYFIP1, FGF2, MYLK, PIK3R1, APC	415	210	6879	1.81546	0.86469	0.0425505	9.42143
KEGG_PATHWAY	hsa04910:Insulin signaling pathway	17	1.88889	0.00844483	EXOC7, SOCS3, SOCS1, CBL, HK2, PRKCI, RPTOR, AKT1, PRKAR2A, KRAS, PYGL, GSK3B, PRKAR1A, RHEB, PIK3CA, EIF4E2, PIK3R1	415	138	6879	2.04196	0.894324	0.0466914	10.5224
KEGG_PATHWAY	hsa04390:Hippo signaling pathway	18	2	0.00898952	WNT5A, YWHAZ, SMAD4, PRKCI, WWC1, MPP5, SMAD3, SMAD2, SMAD1, PATJ, CTNNA1, CTNNB1, CCND1, CCND2, GSK3B, MYC, PPP2R2A, APC	415	151	6879	1.97594	0.908644	0.0486317	11.1646
KEGG_PATHWAY	hsa04520:Adherens junction	11	1.22222	0.00950396	PTPRJ, EGFR, TJP1, RAC1, SMAD4, RHOA, SMAD3, SMAD2, SSX2IP, CTNNA1, CTNNB1	415	71	6879	2.5681	0.920388	0.0503338	11.7673
KEGG_PATHWAY	hsa04210:Apoptosis	10	1.11111	0.0112133	TNFRSF10A, AKT1, CASP3, AIFM1, PIK3CA, NFKB1, FADD, APAF1, MAP3K14, PIK3R1	415	62	6879	2.67353	0.949628	0.0580153	13.7428
KEGG_PATHWAY	hsa05214:Glioma	10	1.11111	0.0150847	AKT1, EGFR, E2F2, CCND1, CDKN2A, KRAS, PIK3CA, CDK4, PTEN, PIK3R1	415	65	6879	2.55014	0.982188	0.0759401	18.0669
KEGG_PATHWAY	hsa04310:Wnt signaling pathway	16	1.77778	0.0183894	CSNK1A1, WNT5A, VANGL1, SMAD4, CSNK1A1L, CTNNB1, CHD8, CCND1, PSEN1, CCND2, JUN, GSK3B, RAC1, RHOA, MYC, APC	415	138	6879	1.92184	0.99269	0.0902521	21.5987
KEGG_PATHWAY	hsa04919:Thyroid hormone signaling pathway	14	1.55556	0.020245	THRB, STAT1, CTNNB1, AKT1, NOTCH2, CCND1, SIN3A, HIF1A, KRAS, GSK3B, RHEB, PIK3CA, MYC, PIK3R1	415	115	6879	2.01794	0.995573	0.0972087	23.5196
KEGG_PATHWAY	hsa04670:Leukocyte transendothelial migration	14	1.55556	0.020245	ICAM1, ITK, CTNNA1, VAV2, CTNNB1, VCAM1, MAPK13, MAPK14, RAC1, RHOA, CLDN1, PIK3CA, RAP1B, PIK3R1	415	115	6879	2.01794	0.995573	0.0972087	23.5196
KEGG_PATHWAY	hsa00280:Valine, leucine and isoleucine degradation	8	0.888889	0.0211632	BCAT1, MUT, OXCT1, HMGCS1, PCCB, ALDH3A2, PCCA, ALDH9A1	415	47	6879	2.82143	0.996547	0.0996496	24.4539
KEGG_PATHWAY	hsa05140:Leishmaniasis	10	1.11111	0.0256447	FOS, MYD88, MAPK13, MAPK14, JUN, NFKB1, HLA-DPA1, STAT1, TAB2, IFNGR1	415	71	6879	2.33463	0.998976	0.117656	28.8648
KEGG_PATHWAY	hsa05168:Herpes simplex infection	19	2.11111	0.0264543	SRSF1, MAVS, IL6, CCL2, SOCS3, NFKB1, FADD, STAT1, TAB2, CDK2, IKBKE, SRSF2, FOS, TAF5L, CASP3, MYD88, JUN, HLA-DPA1, IFNGR1	415	183	6879	1.721	0.999179	0.119153	29.6358
KEGG_PATHWAY	hsa04722:Neurotrophin signaling pathway	14	1.55556	0.0277188	AKT1, KRAS, PSEN1, MAPK13, MAPK14, JUN, GSK3B, RAC1, RHOA, PIK3CA, RAP1B, NFKB1, FOXO3, PIK3R1	415	120	6879	1.93386	0.999418	0.122508	30.8246
KEGG_PATHWAY	hsa04012:ErbB signaling pathway	11	1.22222	0.0352733	AKT1, EGFR, CDKN1B, KRAS, PAK2, JUN, GSK3B, CBL, PIK3CA, MYC, PIK3R1	415	87	6879	2.0958	0.999926	0.15132	37.5488
KEGG_PATHWAY	hsa05323:Rheumatoid arthritis	11	1.22222	0.0377551	ATP6V1C1, ICAM1, FOS, IL6, CCL2, FLT1, JUN, CTLA4, CXCL8, ATP6V1H, HLA-DPA1	415	88	6879	2.07199	0.999963	0.158746	39.6225
KEGG_PATHWAY	hsa01040:Biosynthesis of unsaturated fatty acids	5	0.555556	0.046089	ACOX1, ACOT7, FADS1, SCD, HSD17B12	415	23	6879	3.60346	0.999996	0.188118	46.1299
KEGG_PATHWAY	hsa05412:Arrhythmogenic right ventricular cardiomyopathy (ARVC)	9	1	0.0466691	JUP, DSG2, DMD, DAG1, ITGB4, ITGB5, CDH2, CTNNA1, CTNNB1	415	67	6879	2.22661	0.999997	0.187489	46.5577
KEGG_PATHWAY	hsa04015:Rap1 signaling pathway	20	2.22222	0.0481446	EGFR, FLT1, FGF7, PRKCI, DOCK4, CTNNB1, AKT1, KRAS, MAPK13, MAPK14, RAC1, RHOA, PIK3CA, GNAS, RAP1B, THBS1, RAPGEF2, FGF2, PIK3R1, CSF1R	415	210	6879	1.57866	0.999998	0.190143	47.6321
KEGG_PATHWAY	hsa04621:NOD-like receptor signaling pathway	8	0.888889	0.0493497	IL6, CCL2, MAPK13, MAPK14, ERBIN, CXCL8, NFKB1, TAB2	415	56	6879	2.36799	0.999999	0.191746	48.4946
KEGG_PATHWAY	hsa04664:Fc epsilon RI signaling pathway	9	1	0.0502435	AKT1, KRAS, MAPK13, MAPK14, RAC1, PIK3CA, INPP5D, VAV2, PIK3R1	415	68	6879	2.19387	0.999999	0.192206	49.1259
KEGG_PATHWAY	hsa05416:Viral myocarditis	8	0.888889	0.0534834	ICAM1, EIF4G2, CASP3, CCND1, DMD, RAC1, DAG1, HLA-DPA1	415	57	6879	2.32644	1	0.200761	51.3546
KEGG_PATHWAY	hsa04062:Chemokine signaling pathway	18	2	0.0549511	ITK, CCL2, CXCL8, NFKB1, FOXO3, VAV2, STAT1, STAT3, AKT1, CCR9, KRAS, GSK3B, RAC1, RHOA, PIK3CA, RAP1B, GNB4, PIK3R1	415	186	6879	1.60412	1	0.203024	52.3343
KEGG_PATHWAY	hsa04666:Fc gamma R-mediated phagocytosis	10	1.11111	0.0644351	AKT1, MYO10, ARPC3, CFL2, RAC1, PIK3CA, MARCKS, INPP5D, VAV2, PIK3R1	415	84	6879	1.97332	1	0.231594	58.2382
KEGG_PATHWAY	hsa05145:Toxoplasmosis	12	1.33333	0.0659793	AKT1, CASP3, MYD88, MAPK13, MAPK14, SOCS1, NFKB1, HLA-DPA1, STAT1, TAB2, STAT3, IFNGR1	415	110	6879	1.80828	1	0.233561	59.1329
KEGG_PATHWAY	hsa05152:Tuberculosis	17	1.88889	0.066411	IL6, CEBPB, RAB5C, NFYC, ATP6V1H, NFKB1, FADD, STAT1, AKT1, CASP3, MYD88, MAPK13, MAPK14, RHOA, HLA-DPA1, APAF1, IFNGR1	415	177	6879	1.59204	1	0.231966	59.3798
KEGG_PATHWAY	hsa05203:Viral carcinogenesis	19	2.11111	0.067533	YWHAZ, UBR4, NFKB1, CDK4, CDK2, STAT3, CASP3, CCND1, KRAS, CDKN1B, CDKN2A, CCND2, JUN, RAC1, RHOA, CREB3L2, PIK3CA, RBPJ, PIK3R1	415	205	6879	1.5363	1	0.232566	60.0152
KEGG_PATHWAY	hsa04370:VEGF signaling pathway	8	0.888889	0.0721372	AKT1, KRAS, MAPK13, MAPK14, RAC1, PIK3CA, NOS3, PIK3R1	415	61	6879	2.17389	1	0.2438	62.5275
KEGG_PATHWAY	hsa04915:Estrogen signaling pathway	11	1.22222	0.0732586	AKT1, EGFR, FOS, KRAS, SP1, JUN, CREB3L2, PIK3CA, NOS3, GNAS, PIK3R1	415	99	6879	1.84177	1	0.244231	63.1169
KEGG_PATHWAY	hsa00630:Glyoxylate and dicarboxylate metabolism	5	0.555556	0.0758039	MUT, CS, CAT, PCCB, PCCA	415	27	6879	3.06961	1	0.248863	64.4231
KEGG_PATHWAY	hsa04320:Dorso-ventral axis formation	5	0.555556	0.0758039	EGFR, NOTCH2, KRAS, ETS1, CPEB4	415	27	6879	3.06961	1	0.248863	64.4231
KEGG_PATHWAY	hsa04340:Hedgehog signaling pathway	5	0.555556	0.0758039	CSNK1A1, CSNK1G2, GSK3B, CSNK1A1L, HHIP	415	27	6879	3.06961	1	0.248863	64.4231
KEGG_PATHWAY	hsa05231:Choline metabolism in cancer	11	1.22222	0.081412	AKT1, EGFR, FOS, KRAS, HIF1A, SP1, JUN, RAC1, PIK3CA, RHEB, PIK3R1	415	101	6879	1.8053	1	0.26221	67.1516
KEGG_PATHWAY	hsa04010:MAPK signaling pathway	22	2.44444	0.0822255	EGFR, FGF7, NFKB1, TAB2, FLNB, FLNA, AKT1, FOS, CASP3, KRAS, PAK2, MAPK13, ELK4, JUN, MAPK14, RAC1, RAP1B, RAPGEF2, MAP3K14, FGF2, MYC, PPP5C	415	253	6879	1.44138	1	0.261528	67.531
KEGG_PATHWAY	hsa04141:Protein processing in endoplasmic reticulum	16	1.77778	0.0834514	RAD23B, SEC24B, GANAB, MAN1A2, UBE2G1, UBE2J1, EDEM3, UBE2J2, UBQLN2, UBQLN1, UBE2D3, UBE2D2, HSPA4L, DNAJB1, TRAM1, SEL1L	415	169	6879	1.56932	1	0.262024	68.095
KEGG_PATHWAY	hsa04611:Platelet activation	13	1.44444	0.090942	GNA13, PRKCI, STIM1, AKT1, MAPK13, MAPK14, RHOA, PIK3CA, GNAS, NOS3, RAP1B, PIK3R1, MYLK	415	130	6879	1.65759	1	0.279738	71.3492
KEGG_PATHWAY	hsa05206:MicroRNAs in cancer	24	2.66667	0.0933122	EGFR, E2F2, SOCS1, NFKB1, MMP16, SIRT1, PDCD4, PTEN, RPTOR, STAT3, NOTCH2, CASP3, CCND1, KRAS, CDKN1B, CDKN2A, CCND2, SLC7A1, RHOA, DNMT1, MARCKS, THBS1, MYC, APC	415	286	6879	1.39098	1	0.283088	72.3132
KEGG_PATHWAY	hsa04630:Jak-STAT signaling pathway	14	1.55556	0.096222	IL6, SOCS3, SOCS1, STAT1, STAT3, AKT1, CCND1, CCND2, PIK3CA, IL13RA1, MYC, PIK3R1, IFNGR1, IL2	415	145	6879	1.60043	1	0.287783	73.4558

## Sheet: hsa-miR-18a-5p
Category	Term	Count	%	PValue	Genes	List Total	Pop Hits	Pop Total	Fold Enrichment	Bonferroni	Benjamini	FDR
KEGG_PATHWAY	hsa04110:Cell cycle	10	3.83142	0.000161686	CCND1, PCNA, TP53, SMAD4, PKMYT1, SMAD3, SMAD2, CDC20, MCM5, ATM	112	124	6879	4.9532	0.0329177	0.0329177	0.203606
KEGG_PATHWAY	hsa04068:FoxO signaling pathway	10	3.83142	0.000290693	IRS4, CCND1, MAPK13, TGFBR2, SMAD4, SMAD3, SMAD2, PTEN, STK4, ATM	112	134	6879	4.58356	0.058407	0.0296428	0.365787
KEGG_PATHWAY	hsa05210:Colorectal cancer	7	2.68199	0.000454608	CCND1, BCL2, TGFBR2, TP53, SMAD4, SMAD3, SMAD2	112	62	6879	6.93448	0.0898312	0.030888	0.571503
KEGG_PATHWAY	hsa04390:Hippo signaling pathway	10	3.83142	0.000699927	PARD6B, CCND1, CRB1, CTGF, TGFBR2, SMAD4, SMAD3, SMAD2, WWTR1, PPP1CB	112	151	6879	4.06753	0.134922	0.0355853	0.878653
KEGG_PATHWAY	hsa05205:Proteoglycans in cancer	11	4.21456	0.00138088	CCND1, EZR, HIF1A, MAPK13, TP53, ESR1, ITGA2, FAS, SDC4, DDX5, PPP1CB	112	200	6879	3.37808	0.248768	0.0556024	1.72666
KEGG_PATHWAY	hsa05166:HTLV-I infection	12	4.5977	0.00252405	CCND1, ETS2, TGFBR2, PCNA, TP53, SMAD4, SMAD3, SMAD2, CDC20, CANX, ATM, TBPL1	112	254	6879	2.90172	0.407343	0.083497	3.13527
KEGG_PATHWAY	hsa05212:Pancreatic cancer	6	2.29885	0.00382492	CCND1, TGFBR2, TP53, SMAD4, SMAD3, SMAD2	112	65	6879	5.66951	0.54764	0.10714	4.71558
KEGG_PATHWAY	hsa04962:Vasopressin-regulated water reabsorption	5	1.91571	0.00530587	RAB5C, RAB5A, DCTN5, GNAS, DCTN2	112	44	6879	6.9795	0.667541	0.128601	6.48572
KEGG_PATHWAY	hsa05200:Pathways in cancer	14	5.36398	0.0103178	TGFBR2, TP53, SMAD4, ITGA2, SMAD3, SMAD2, STK4, PTEN, CCND1, HIF1A, BCL2, GNAS, FAS, RUNX1	112	393	6879	2.18798	0.883151	0.212224	12.2542
KEGG_PATHWAY	hsa04919:Thyroid hormone signaling pathway	7	2.68199	0.0104597	CCND1, HIF1A, THRA, NCOA3, TP53, ESR1, ATP1A1	112	115	6879	3.73859	0.886569	0.195598	12.4127
KEGG_PATHWAY	hsa04141:Protein processing in endoplasmic reticulum	8	3.06513	0.0191193	SEC24B, VCP, UBE2G1, BCL2, UBQLN4, SAR1A, CANX, SEC61A1	112	169	6879	2.90744	0.981611	0.304604	21.5982
KEGG_PATHWAY	hsa05162:Measles	7	2.68199	0.0202203	RACK1, IFNAR2, CCND1, FCGR2B, TP53, FAS, TNFAIP3	112	133	6879	3.23261	0.985426	0.296984	22.7003
KEGG_PATHWAY	hsa04115:p53 signaling pathway	5	1.91571	0.0226075	CCND1, TP53, FAS, PTEN, ATM	112	67	6879	4.58356	0.991204	0.305186	25.0409
KEGG_PATHWAY	hsa05142:Chagas disease (American trypanosomiasis)	6	2.29885	0.0260247	MAPK13, TGFBR2, SMAD3, SMAD2, GNAS, FAS	112	104	6879	3.54344	0.99574	0.322869	28.2781
KEGG_PATHWAY	hsa05220:Chronic myeloid leukemia	5	1.91571	0.0285557	CCND1, TGFBR2, TP53, SMAD4, RUNX1	112	72	6879	4.26525	0.997514	0.329549	30.5922
KEGG_PATHWAY	hsa05161:Hepatitis B	7	2.68199	0.0293966	CCND1, BCL2, PCNA, TP53, SMAD4, FAS, PTEN	112	145	6879	2.96509	0.997922	0.320243	31.3457
KEGG_PATHWAY	hsa04145:Phagosome	7	2.68199	0.0339179	STX12, FCGR2B, RAB5C, RAB5A, ITGA2, CANX, SEC61A1	112	150	6879	2.86625	0.999209	0.343063	35.2695
KEGG_PATHWAY	hsa04144:Endocytosis	9	3.44828	0.0404459	PARD6B, ACAP3, RAB5C, TGFBR2, RAB5A, VPS37A, SMAD3, ARF6, SMAD2	112	241	6879	2.29368	0.999806	0.377988	40.5716
KEGG_PATHWAY	hsa05206:MicroRNAs in cancer	10	3.83142	0.0408917	RPS6KA5, CCND1, EZR, BCL2, DICER1, TP53, DNMT1, CDCA5, PTEN, ATM	112	286	6879	2.14754	0.999824	0.365469	40.9187
KEGG_PATHWAY	hsa04350:TGF-beta signaling pathway	5	1.91571	0.0463217	TGFBR2, SMAD4, SMAD3, SMAD2, ID4	112	84	6879	3.65593	0.999946	0.387918	44.999
KEGG_PATHWAY	hsa05014:Amyotrophic lateral sclerosis (ALS)	4	1.53257	0.04636	MAPK13, BCL2, RAB5A, TP53	112	50	6879	4.91357	0.999946	0.373689	45.0268
KEGG_PATHWAY	hsa05222:Small cell lung cancer	5	1.91571	0.048027	CCND1, BCL2, TP53, ITGA2, PTEN	112	85	6879	3.61292	0.999962	0.370672	46.2259
KEGG_PATHWAY	hsa04510:Focal adhesion	8	3.06513	0.0484006	CCND1, DIAPH1, BCL2, RAP1A, ITGA2, PTEN, PPP1CB, MYLK	112	206	6879	2.38523	0.999965	0.360136	46.4913
KEGG_PATHWAY	hsa04611:Platelet activation	6	2.29885	0.0585745	MAPK13, RAP1A, ITGA2, GNAS, PPP1CB, MYLK	112	130	6879	2.83475	0.999996	0.405839	53.2713
KEGG_PATHWAY	hsa04120:Ubiquitin mediated proteolysis	6	2.29885	0.070097	CUL4A, PIAS3, UBE2G1, CDC20, HERC1, MID1	112	137	6879	2.68991	1	0.452147	59.9898
KEGG_PATHWAY	hsa04261:Adrenergic signaling in cardiomyocytes	6	2.29885	0.0718388	RPS6KA5, MAPK13, BCL2, GNAS, ATP1A1, PPP1CB	112	138	6879	2.67042	1	0.447627	60.9242
KEGG_PATHWAY	hsa05168:Herpes simplex infection	7	2.68199	0.0749203	IFNAR2, SP100, SRSF6, TP53, FAS, PPP1CB, TBPL1	112	183	6879	2.34939	1	0.449564	62.5283
KEGG_PATHWAY	hsa04210:Apoptosis	4	1.53257	0.0780334	BCL2, TP53, FAS, ATM	112	62	6879	3.96256	1	0.451541	64.0871
KEGG_PATHWAY	hsa00750:Vitamin B6 metabolism	2	0.766284	0.0930263	PNPO, PSAT1	112	6	6879	20.4732	1	0.501903	70.7921

## Sheet: hsa-miR-93-5p
Category	Term	Count	%	PValue	Genes	List Total	Pop Hits	Pop Total	Fold Enrichment	Bonferroni	Benjamini	FDR
KEGG_PATHWAY	hsa05161:Hepatitis B	28	2.31023	1.06198e-06	MAVS, E2F1, E2F2, YWHAZ, E2F3, GRB2, CXCL8, NFKBIA, PTEN, TGFB1, MYC, PIK3R2, EGR2, CREB1, CYCS, SMAD4, BIRC5, RB1, STAT3, PRKCB, IFNAR1, MAPK1, CDKN1A, CCND1, JUN, YWHAQ, MAPK9, JAK1	466	145	6879	2.85055	0.000277138	0.000277138	0.00138895
KEGG_PATHWAY	hsa05166:HTLV-I infection	39	3.21782	2.31397e-06	E2F1, CRTC3, E2F2, E2F3, PDGFB, XIAP, PPP3R1, NFKBIA, CDC16, TGFB1, MAP3K3, ELK4, XBP1, PRKACB, MYC, PIK3R2, FZD9, ICAM1, DVL3, KAT2B, EGR2, ANAPC5, RAN, CREB1, POLE, TGFBR2, SMAD4, RB1, VDAC1, WNT2B, HLA-F, CCND1, CDKN1A, MAD2L1, JUN, RRAS2, JAK1, MAP3K14, TP53INP1	466	254	6879	2.26658	0.000603764	0.000301928	0.00302638
KEGG_PATHWAY	hsa05200:Pathways in cancer	51	4.20792	7.58382e-06	E2F1, F2RL3, E2F2, E2F3, XIAP, PDGFB, GRB2, GNA12, EGLN3, CXCL8, NFKBIA, LPAR2, ITGB1, TCF7L2, GLI3, PTEN, TGFB1, PRKACB, MYC, PIK3R2, FZD9, DVL3, BMP2, MSH3, PTGER4, TGFBR2, CYCS, SMAD4, ITGA2, BIRC5, RB1, DAPK3, STAT3, WNT2B, PRKCB, CCDC6, MAPK1, CCND1, CDKN1A, HIF1A, JUN, VEGFA, GNB5, JAK1, MDM2, MAPK9, GNB4, GNAS, LAMC1, CRK, F2R	466	393	6879	1.91565	0.00197743	0.000659577	0.00991837
KEGG_PATHWAY	hsa05219:Bladder cancer	13	1.07261	1.02487e-05	E2F1, E2F2, E2F3, CXCL8, RB1, DAPK3, RPS6KA5, MAPK1, CCND1, CDKN1A, VEGFA, MDM2, MYC	466	41	6879	4.68057	0.00267136	0.000668511	0.0134034
KEGG_PATHWAY	hsa04144:Endocytosis	34	2.80528	6.88378e-05	CAV2, CAV1, PARD3, RAB5B, LDLR, TSG101, CAPZA2, EPS15L1, EEA1, DAB2, GBF1, ARPC2, SH3GLB1, ZFYVE9, WIPF2, ITCH, IQSEC1, HSPA8, PARD6B, TGFBR2, PRKCI, HLA-F, AP2A2, RABEP1, RAB22A, ACAP2, MDM2, GRK7, WASL, RAB10, ARAP2, GRK3, VPS26A, RAB11FIP1	466	241	6879	2.08258	0.0178068	0.00358701	0.0899951
KEGG_PATHWAY	hsa05220:Chronic myeloid leukemia	16	1.32013	7.18168e-05	E2F1, E2F2, E2F3, GRB2, TGFBR2, SMAD4, NFKBIA, RB1, TGFB1, MAPK1, CDKN1A, CCND1, MDM2, MYC, CRK, PIK3R2	466	72	6879	3.2804	0.0185703	0.00311927	0.093888
KEGG_PATHWAY	hsa05212:Pancreatic cancer	14	1.15512	0.000331708	E2F1, E2F2, MAPK1, E2F3, CCND1, VEGFA, TGFBR2, SMAD4, MAPK9, JAK1, RB1, TGFB1, STAT3, PIK3R2	466	65	6879	3.17947	0.0829471	0.0122938	0.43297
KEGG_PATHWAY	hsa04350:TGF-beta signaling pathway	16	1.32013	0.000434084	BMP2, E2F5, MINOS1-NBL1, SMAD7, SMAD6, TGFBR2, SMAD5, BMPR2, SMAD4, TGFB1, ACVR1B, NBL1, MAPK1, ZFYVE9, MYC, BMP8B	466	84	6879	2.81177	0.107136	0.0140652	0.56625
KEGG_PATHWAY	hsa05215:Prostate cancer	16	1.32013	0.000724305	E2F1, E2F2, E2F3, PDGFB, GRB2, CREB1, NFKBIA, RB1, PTEN, TCF7L2, MAPK1, PDPK1, CDKN1A, CCND1, MDM2, PIK3R2	466	88	6879	2.68396	0.172306	0.0207932	0.943181
KEGG_PATHWAY	hsa05210:Colorectal cancer	13	1.07261	0.00076229	MAPK1, CCND1, MSH3, JUN, CYCS, TGFBR2, SMAD4, MAPK9, BIRC5, MYC, TCF7L2, TGFB1, PIK3R2	466	62	6879	3.09522	0.180478	0.0197066	0.992417
KEGG_PATHWAY	hsa05205:Proteoglycans in cancer	27	2.22772	0.000901051	CAV2, CAV1, GRB2, PPP1R12B, ITGB1, PDCD4, TGFB1, PDPK1, GAB1, PRKACB, MYC, FRS2, PIK3R2, FZD9, ITGA2, IGF2, DDX5, STAT3, PRKCB, WNT2B, MAPK1, CDKN1A, CCND1, HIF1A, RRAS2, VEGFA, MDM2	466	200	6879	1.99284	0.209651	0.021162	1.17209
KEGG_PATHWAY	hsa04390:Hippo signaling pathway	22	1.81518	0.0011694	FZD9, DVL3, PARD6B, YWHAZ, PARD3, BMP2, MOB1A, TGFBR2, BMPR2, SMAD4, PRKCI, WWC1, BIRC5, TCF7L2, LATS2, TGFB1, WNT2B, CCND1, FRMD6, YWHAQ, MYC, BMP8B	466	151	6879	2.15073	0.263165	0.0251282	1.51869
KEGG_PATHWAY	hsa05214:Glioma	13	1.07261	0.00118129	E2F1, E2F2, E2F3, PDGFB, GRB2, RB1, PTEN, PRKCB, MAPK1, CDKN1A, CCND1, MDM2, PIK3R2	466	65	6879	2.95236	0.265452	0.0234514	1.53403
KEGG_PATHWAY	hsa05164:Influenza A	24	1.9802	0.00140216	MAVS, ICAM1, NUP98, DDX39B, CYCS, CXCL8, NFKBIA, CCL5, TLR7, PRKCB, IFNAR1, VDAC1, IRAK4, MAPK1, IFNAR2, TNFRSF10B, JUN, EIF2S1, MAPK9, JAK1, KPNA2, HSPA8, PIK3R2, ADAR	466	174	6879	2.03611	0.306651	0.0258195	1.81843
KEGG_PATHWAY	hsa04110:Cell cycle	19	1.56766	0.00157939	E2F1, E2F2, YWHAZ, E2F3, ANAPC5, E2F5, SMAD4, PKMYT1, CDC16, RB1, WEE1, MCM5, TGFB1, CDKN1A, CCND1, MAD2L1, YWHAQ, MDM2, MYC	466	124	6879	2.26189	0.338037	0.0271283	2.04608
KEGG_PATHWAY	hsa04962:Vasopressin-regulated water reabsorption	10	0.825083	0.00230015	STX4, DYNC1LI2, RAB5B, CREB1, DCTN5, GNAS, PRKACB, DCTN6, DCTN4, DCTN1	466	44	6879	3.35496	0.451754	0.0368677	2.96691
KEGG_PATHWAY	hsa05203:Viral carcinogenesis	26	2.14521	0.00276204	YWHAZ, GRB2, NFKBIA, PMAIP1, HIST2H4B, GTF2H2C, SND1, HIST1H2BJ, PRKACB, PIK3R2, KAT2B, HIST1H2BD, EGR2, HIST1H2BG, CREB1, GTF2H3, RB1, STAT3, HLA-F, MAPK1, CDKN1A, CCND1, JUN, YWHAQ, MDM2, JAK1	466	205	6879	1.87223	0.514167	0.0415751	3.5528
KEGG_PATHWAY	hsa04068:FoxO signaling pathway	19	1.56766	0.0037709	STK11, GRB2, TGFBR2, SMAD4, FOXO3, CCNG2, PTEN, BCL2L11, STAT3, TGFB1, SOD2, MAPK1, PDPK1, CDKN1A, CCND1, SLC2A4, MAPK9, MDM2, PIK3R2	466	134	6879	2.09309	0.626958	0.0533079	4.82116
KEGG_PATHWAY	hsa05223:Non-small cell lung cancer	11	0.907591	0.00384205	E2F1, MAPK1, E2F2, PDPK1, E2F3, CCND1, GRB2, RB1, FOXO3, PRKCB, PIK3R2	466	56	6879	2.89964	0.633848	0.0515055	4.91003
KEGG_PATHWAY	hsa05211:Renal cell carcinoma	12	0.990099	0.00432032	PAK6, MAPK1, HIF1A, PDGFB, GRB2, JUN, GAB1, VEGFA, EGLN3, CRK, TGFB1, PIK3R2	466	66	6879	2.68396	0.676982	0.0549358	5.50541
KEGG_PATHWAY	hsa05222:Small cell lung cancer	14	1.15512	0.00432994	E2F1, E2F2, E2F3, XIAP, CYCS, ITGA2, NFKBIA, RB1, PTEN, ITGB1, CCND1, LAMC1, MYC, PIK3R2	466	85	6879	2.43136	0.677795	0.0525032	5.51734
KEGG_PATHWAY	hsa04919:Thyroid hormone signaling pathway	17	1.40264	0.00434382	KAT2B, ATP1B3, PFKFB2, MED13L, PRKCB, MED12L, MAPK1, PDPK1, CCND1, HIF1A, NCOA3, MED16, MED17, MDM2, PRKACB, MYC, PIK3R2	466	115	6879	2.18218	0.678965	0.0503347	5.53457
KEGG_PATHWAY	hsa04115:p53 signaling pathway	12	0.990099	0.00486352	CDKN1A, CCND1, ZMAT3, RRM2, CYCS, MDM2, PMAIP1, SESN2, PTEN, CCNG2, SESN1, SESN3	466	67	6879	2.6439	0.719863	0.0538224	6.17744
KEGG_PATHWAY	hsa04010:MAPK signaling pathway	28	2.31023	0.0116524	PDGFB, GRB2, MAPKAPK5, GNA12, MKNK2, PPP3R1, TGFB1, MAP3K4, MAP3K3, MAP3K2, ELK4, PRKACB, MYC, HSPA8, TGFBR2, NR4A1, PRKCB, RPS6KA5, MAPK1, DUSP2, RPS6KA4, JUN, RRAS2, MAPK9, MAP3K14, DUSP8, CRK, MAP3K13	466	253	6879	1.63372	0.953072	0.119675	14.2124
KEGG_PATHWAY	hsa05218:Melanoma	11	0.907591	0.0201964	E2F1, MAPK1, E2F2, CDKN1A, E2F3, CCND1, PDGFB, MDM2, RB1, PTEN, PIK3R2	466	71	6879	2.28704	0.995133	0.191851	23.4213
KEGG_PATHWAY	hsa04917:Prolactin signaling pathway	11	0.907591	0.0201964	MAPK1, CCND1, GRB2, IRF1, MAPK9, SOCS7, ESR2, FOXO3, SOCS5, STAT3, PIK3R2	466	71	6879	2.28704	0.995133	0.191851	23.4213
KEGG_PATHWAY	hsa04510:Focal adhesion	23	1.89769	0.0213415	CAV2, CAV1, XIAP, PDGFB, GRB2, PPP1R12B, MYLK3, ITGA2, ARHGAP35, ITGB1, PTEN, PRKCB, PAK6, MAPK1, PDPK1, CCND1, ITGB8, JUN, VEGFA, MAPK9, LAMC1, CRK, PIK3R2	466	206	6879	1.64816	0.996413	0.194712	24.5837
KEGG_PATHWAY	hsa05213:Endometrial cancer	9	0.742574	0.0222432	MAPK1, PDPK1, CCND1, GRB2, FOXO3, PTEN, MYC, TCF7L2, PIK3R2	466	52	6879	2.55493	0.99718	0.195428	25.4874
KEGG_PATHWAY	hsa04910:Insulin signaling pathway	17	1.40264	0.0233397	GRB2, MKNK2, PRKCI, PDE3B, HK1, MAPK1, PDPK1, PPP1R3B, SLC2A4, PYGL, PRKAR1A, FASN, MAPK9, PRKACB, TRIP10, CRK, PIK3R2	466	138	6879	1.81848	0.997896	0.197592	26.5729
KEGG_PATHWAY	hsa04810:Regulation of actin cytoskeleton	23	1.89769	0.0259531	PDGFB, LIMK1, ARHGEF7, PPP1R12B, MYLK3, GNA12, SSH2, ABI2, ITGA2, ARHGAP35, ITGB1, PAK6, MAPK1, ARPC2, ITGB8, CFL2, RRAS2, WASL, PIP4K2A, CRK, PIP4K2C, F2R, PIK3R2	466	210	6879	1.61677	0.998954	0.210742	29.1015
KEGG_PATHWAY	hsa04550:Signaling pathways regulating pluripotency of stem cells	17	1.40264	0.0263255	FZD9, DVL3, BMP2, GRB2, SMAD5, BMPR2, SMAD4, REST, STAT3, WNT2B, ACVR1B, MAPK1, RIF1, JAK1, SKIL, MYC, PIK3R2	466	140	6879	1.7925	0.999054	0.207134	29.4552
KEGG_PATHWAY	hsa05230:Central carbon metabolism in cancer	10	0.825083	0.0270869	MAPK1, SLC1A5, HIF1A, PGAM1, PFKP, HK1, PTEN, MYC, PDHB, PIK3R2	466	64	6879	2.30653	0.999229	0.206419	30.1733
KEGG_PATHWAY	hsa04668:TNF signaling pathway	14	1.15512	0.0276159	ICAM1, DNM1L, CREB1, NFKBIA, MMP3, CCL5, RPS6KA5, MAPK1, RPS6KA4, JUN, MAPK9, ITCH, MAP3K14, PIK3R2	466	107	6879	1.93145	0.999331	0.204203	30.6683
KEGG_PATHWAY	hsa04380:Osteoclast differentiation	16	1.32013	0.0304047	GRB2, CREB1, TGFBR2, PPP3R1, NFKBIA, TGFB1, IFNAR1, CYLD, MAPK1, IFNAR2, SQSTM1, JUN, MAPK9, JAK1, MAP3K14, PIK3R2	466	131	6879	1.80297	0.999684	0.216673	33.2244
KEGG_PATHWAY	hsa04012:ErbB signaling pathway	12	0.990099	0.0316323	PAK6, MAPK1, CDKN1A, EREG, GRB2, JUN, GAB1, MAPK9, CRK, MYC, PRKCB, PIK3R2	466	87	6879	2.03611	0.999773	0.218662	34.3217
KEGG_PATHWAY	hsa05145:Toxoplasmosis	14	1.15512	0.0336895	XIAP, LDLR, CYCS, NFKBIA, ITGB1, STAT3, TGFB1, IRAK4, MAPK1, PDPK1, JAK1, MAPK9, LAMC1, HSPA8	466	110	6879	1.87877	0.99987	0.225515	36.1233
KEGG_PATHWAY	hsa05162:Measles	16	1.32013	0.0342046	MAVS, NFKBIA, TLR7, STAT3, IFNAR1, IRAK4, IFNAR2, CCND1, TNFRSF10B, EIF2S1, CD46, JAK1, HSPA8, ADAR, CD28, PIK3R2	466	133	6879	1.77586	0.999886	0.223007	36.5672
KEGG_PATHWAY	hsa05160:Hepatitis C	16	1.32013	0.0342046	MAVS, LDLR, GRB2, CXCL8, NFKBIA, STAT3, IFNAR1, MAPK1, IFNAR2, PDPK1, CDKN1A, EIF2S1, IRF1, JAK1, MAPK9, PIK3R2	466	133	6879	1.77586	0.999886	0.223007	36.5672
KEGG_PATHWAY	hsa05169:Epstein-Barr virus infection	15	1.23762	0.0351467	ICAM1, CDKN1A, PSMD11, JUN, NFKBIA, MAPK9, JAK1, MDM2, PSMD4, RB1, MAP3K14, MYC, STAT3, PIK3R2, HLA-F	466	122	6879	1.81498	0.999912	0.223057	37.3717
KEGG_PATHWAY	hsa03013:RNA transport	19	1.56766	0.0417006	EEF1A1, NUP153, NUP98, ELAC2, UPF1, RAN, DDX39B, NUP188, RANGAP1, EIF4G2, EIF2S1, EIF4A2, NUP205, GEMIN8, NUP107, ACIN1, NUP35, EIF2B2, NUP58	466	172	6879	1.63066	0.999985	0.25365	42.713
KEGG_PATHWAY	hsa04120:Ubiquitin mediated proteolysis	16	1.32013	0.0428216	XIAP, ANAPC5, UBE3B, UBE2J1, CDC16, UBOX5, UBE2Q2, UBE2L3, TRIM37, UBE2O, HUWE1, UBR5, UBE2M, TRIM32, MDM2, ITCH	466	137	6879	1.72401	0.999989	0.253897	43.5833
KEGG_PATHWAY	hsa04710:Circadian rhythm	6	0.49505	0.0546611	NPAS2, CRY2, CREB1, RORA, FBXL3, CLOCK	466	31	6879	2.85712	1	0.307039	52.0585
KEGG_PATHWAY	hsa04066:HIF-1 signaling pathway	12	0.990099	0.0581724	MAPK1, CDKN1A, HIF1A, VEGFA, MKNK2, EGLN3, HK1, GAPDH, STAT3, PDHB, PRKCB, PIK3R2	466	96	6879	1.84523	1	0.317181	54.336
KEGG_PATHWAY	hsa04722:Neurotrophin signaling pathway	14	1.15512	0.0607895	RPS6KA5, IRAK4, MAPK1, PDPK1, MAP3K3, GRB2, JUN, GAB1, NFKBIA, MAPK9, FOXO3, FRS2, CRK, PIK3R2	466	120	6879	1.72221	1	0.322762	55.968
KEGG_PATHWAY	hsa04151:PI3K-Akt signaling pathway	32	2.64026	0.0621016	YWHAZ, PHLPP2, MCL1, PDGFB, STK11, GRB2, LPAR2, FOXO3, ITGB1, PTEN, PDPK1, ITGB8, MYC, PIK3R2, CREB1, NR4A1, ITGA2, BCL2L11, IFNAR1, IFNAR2, MAPK1, CCND1, CDKN1A, VEGFA, YWHAQ, GNB5, JAK1, MDM2, GNB4, LAMC1, THEM4, F2R	466	345	6879	1.36921	1	0.322371	56.7658
KEGG_PATHWAY	hsa04152:AMPK signaling pathway	14	1.15512	0.0711594	STK11, PFKFB2, CREB1, SCD, PFKP, ELAVL1, FOXO3, CPT1A, CCND1, PDPK1, SLC2A4, FASN, RAB10, PIK3R2	466	123	6879	1.68021	1	0.354594	61.9193
KEGG_PATHWAY	hsa03018:RNA degradation	10	0.825083	0.0739918	BTG2, CNOT6L, BTG3, PAPD7, PFKP, LSM3, PAPD5, DIS3L, CNOT7, CNOT4	466	77	6879	1.91712	1	0.359726	63.4104
KEGG_PATHWAY	hsa00240:Pyrimidine metabolism	12	0.990099	0.0779105	POLR3G, PRIM1, POLR3F, RRM2, POLE, DHODH, POLR3A, POLR1B, ENTPD4, CMPK1, POLR2A, NME6	466	101	6879	1.75388	1	0.36886	65.3846
KEGG_PATHWAY	hsa03030:DNA replication	6	0.49505	0.0924447	PRIM1, RPA2, RFC3, POLE, RNASEH1, MCM5	466	36	6879	2.4603	1	0.416473	71.8794
KEGG_PATHWAY	hsa04150:mTOR signaling pathway	8	0.660066	0.094336	MAPK1, PDPK1, ULK1, STK11, RRAGD, PTEN, PRKCB, PIK3R2	466	58	6879	2.03611	1	0.416543	72.6363
KEGG_PATHWAY	hsa00600:Sphingolipid metabolism	7	0.577558	0.0948351	SGPL1, SPTLC2, CERS2, ACER2, UGCG, SGMS1, DEGS1	466	47	6879	2.19857	1	0.411822	72.8328
